# Supplementary material
Source: publisher figshare collection journal article supplement (https://asha.figshare.com/articles/dataset/_/27996839)

**Supplemental Material S1.** Participants’ reported areas of CSD research expertise across groups.

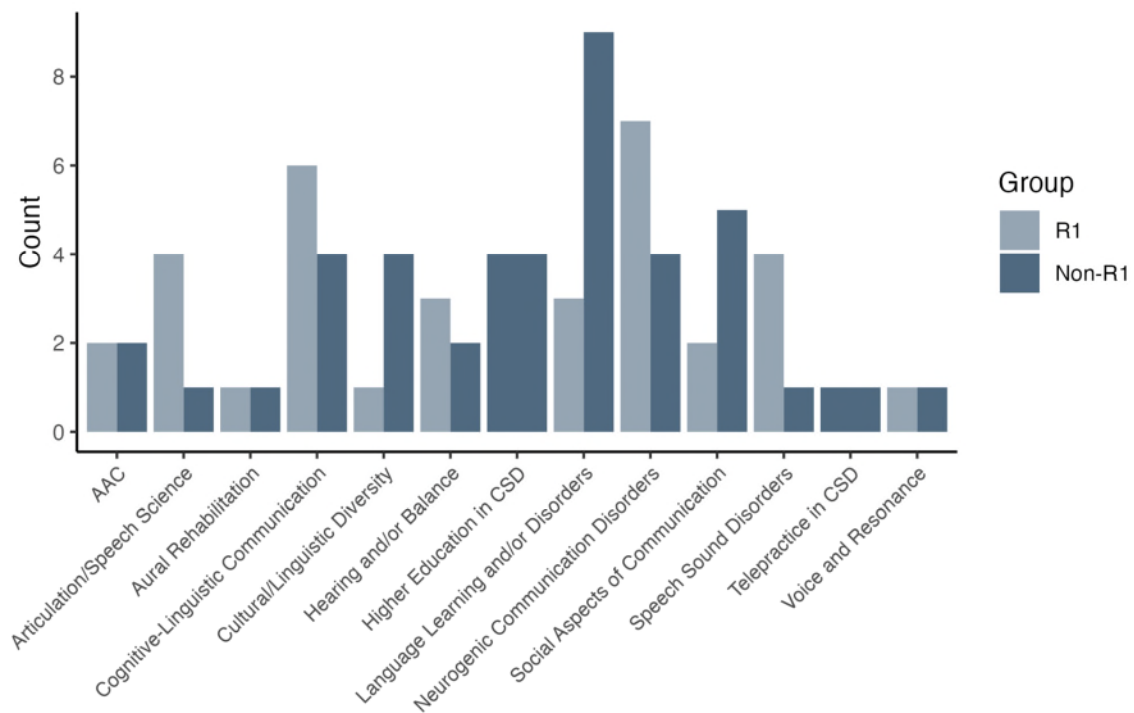

Supplement: Supplementary file 2 [file 3]
